# Supplementary material
Source: HighWire-hosted journal article supplement (https://srh.bmj.com/content/48/1/35)
Supplement: inline-supplementary-material-1 [file inline-supplementary-material-1.pdf]

Confidential

Page 1 of 7

## NI Survey on Abortion OBGYN Units

Please complete the survey below.

Thank you!

- 
- 1) This is your unique identifier number - take a note of it to use in case you decide to withdraw from the study. \_\_\_\_\_

---

Please complete this form after you have read the Information Sheet and informed consent details.

Title of Study: Survey of Obstetrics and Gynaecology Staff in Northern Ireland on forthcoming abortion law reform

Department: UCL Medical School

Name and Contact Details of the Researcher(s): Dr Fiona Bloomer, fk.bloomer@ulster.ac.uk

Name and Contact Details of the Principal Researcher: Dr Jayne Kavanagh j.kavanagh@ucl.ac.uk

Name and Contact Details of the UCL Data Protection Officer: Ms Alex Potts data-protection@ucl.ac.uk University College London, Gower Street, London WC1E 6BT

This study has been approved by the UCL Research Ethics Committee: Project ID number: 4415/005

- 
- 2) I have read the information sheet and the informed consent sheet.  Yes

I consent to participate in the study.

Confidential

Page 2 of 7

**Survey Introduction****Aim:**

**This survey seeks the views of those working in NHS obstetrics and gynaecology services in Northern Ireland on forthcoming legal changes to abortion law in Northern Ireland. Questions are also asked at the end of the training you may already have acquired.**

**What are the legal changes:**

**From 22nd October, unless the Northern Ireland Assembly is operating, abortion will become decriminalised in Northern Ireland. A consultation period will open shortly on the regulations that will govern access to abortion. It is expected that the regulations will come into effect in March 2020. In the interim period it is expected that services may be provided. In such instances general regulations for medical services will apply.**

**What will these changes mean:**

**Decriminalisation of abortion means abortion will be removed from criminal law (except in cases of coerced/ forced abortion; abortion beyond regulations). Abortion will be subject to regulations as with other health procedures.**

Section 1 Background information

- 
- 3) 1. Which Trust area do you work in?
- BHSCT
  - WHSCT
  - SEHSCT
  - NHSCT
  - SHSCT
- 
- 4) What professional group do you belong to?
- Obstetrics & Gynaecology
  - Anaesthetics
  - Theatre Nurse
  - Gynae Ward nurse
  - Early pregnancy assessment service nurse
  - Midwife
- 
- 5) Which age category do you belong to?
- 18-29
  - 30-39
  - 40-49
  - 50+
- 
- 6) Gender identity
- woman
  - man
  - nonbinary
  - prefer not to disclose
  - prefer to self-describe
- 
- 7) Gender identity - if you prefer to self-describe please provide your response here: \_\_\_\_\_

Confidential

Page 3 of 7

- 
- 8) Religious affinity:
- None
  - Protestant
  - Catholic
  - Muslim
  - Hindu
  - Buddhist
  - Jewish
  - Sikh
  - Prefer not to say
  - Other (see next question)

- 
- 9) If your religious affinity is not listed above please add your response here:
-

Confidential

Page 4 of 7

**Section 2 Views on forthcoming/ proposed changes to abortion law**

- 10) Before this questionnaire, were you aware that abortion in Northern Ireland will be decriminalised after 21st October 2019?  Yes  
 No
- 
- 11) Please explain the reason for your answer to the previous question
- 
- 12) Are you in favour of decriminalisation on the understanding that limit will be 24 weeks?  Yes  
 No  
 Don't know
- 
- 13) Please explain the reason for your answer to the previous question
- 
- 14) Views on what the regulations might cover: Would you prefer regulations with restrictions based on the reason for abortion?  Yes  
 No  
 Don't know
- 
- 15) Please explain the reason for your answer to the previous question
- 
- 16) Views on what the regulations might cover: Would you prefer regulations with restrictions based on the gestation at time of abortion?  Yes  
 No  
 Don't know
- 
- 17) Please explain the reason for your answer to the previous question
- 
- 18) Views on what the regulations might cover: Would you prefer no restrictions on the reason for abortion or the gestation at the time of abortion?  Yes  
 No  
 Don't know
- 
- 19) Please explain the reason for your answer to the previous question
- 
- 20) Once abortion has been decriminalised, although you will be able to conscientiously object to active participation in an abortion procedure, you will be obliged to participate in the care of these patients around these procedures. Are you content with this?  Yes  
 No  
 Don't know
- 
- 21) Please explain the reason for your answer to the previous question
- 
- 22) Would you be willing to actively participate in medical abortion of pregnancy (where medication is used to end the pregnancy) in certain circumstances?  Yes  
 No  
 Don't know

Confidential

Page 5 of 7

---

23) Please explain the reason for your answer to the previous question

---

---

24) Would you be willing to actively participate in medical abortion of pregnancy (where medication is used to end the pregnancy) in all circumstances?

Yes  
 No  
 Don't know

---

---

25) Please explain the reason for your answer to the previous question

---

---

26) Would you be willing to actively participate in surgical abortion of pregnancy (where surgical methods are used to end the pregnancy) in certain circumstances?

Yes  
 No  
 Don't know

---

---

27) Please explain the reason for your answer to the previous question

---

---

28) Would you be willing to actively participate in surgical abortion of pregnancy (where surgical methods are used to end the pregnancy) in all circumstances?

Yes  
 No  
 Don't know

---

---

29) Please explain the reason for your answer to the previous question

---

---

30) Would you welcome training on the following: The new regulations on abortion

Yes  
 No  
 Don't know

---

---

31) Please explain the reason for your answer to the previous question

---

---

32) Would you welcome training on the following: Counselling a woman requesting an abortion about new abortion services.

Yes  
 No  
 Don't know

---

---

33) Please explain the reason for your answer to the previous question

---

---

34) Would you welcome training on the following: The differing types of abortion.

Yes  
 No  
 Don't know

---

---

35) Please explain the reason for your answer to the previous question

---

Confidential

Page 6 of 7

**Section 3 - Training on abortion provision already completed**

- 36) Have you been trained on how to perform vacuum aspiration abortions?  Yes  
 No  
 Not applicable
- 
- 37) If you been trained on how to perform vacuum aspiration abortions - to what gestation, in number of weeks, is this? \_\_\_\_\_
- 
- 38) Have you been trained on how to perform dilation and evacuation abortions?  Yes  
 No  
 Not applicable
- 
- 39) If you been trained on how to perform dilation and evacuation abortions - to what gestation, in number of weeks, is this? \_\_\_\_\_
- 
- 40) Have you been trained on how to perform or supervise medical abortions?  Yes  
 No  
 Not applicable
- 
- 41) If you been trained on how to perform / supervise medical abortions - to what gestation, in number of weeks, is this? \_\_\_\_\_

*Confidential*

Page 7 of 7

---

**Final Section**

42) Do you wish to make any final comments?

---
